# Supplementary material for: Trends of Mental Disorders and Treatment Continuity Predictors of New Patients in the Paediatric Psychiatry Clinic of a University Hospital
Source: Int J Environ Res Public Health. 2021 Sep 12;18(18):9613. doi: 10.3390/ijerph18189613 (PMC8464688; doi:10.3390/ijerph18189613)
Supplement: Supplementary file 1 [file ijerph-18-09613-s001.zip › ijerph-1329582-supplementary.pdf]

**Table S1.** Diagnoses with F, R, and Z codes.

| Groups                                                             | KCD-7 codes | Diagnosis                                                                                     |
|--------------------------------------------------------------------|-------------|-----------------------------------------------------------------------------------------------|
| Depressive symptom                                                 | F32         | Depressive episode                                                                            |
|                                                                    | F33         | Recurrent depressive disorder                                                                 |
| Neurotic symptom                                                   | F40         | Phobic anxiety disorders                                                                      |
|                                                                    | F41         | Other anxiety disorders                                                                       |
|                                                                    | F42         | Obsessive-compulsive disorder                                                                 |
|                                                                    | F43         | Reaction to severe stress, and adjustment disorders                                           |
|                                                                    | F44         | Dissociative [conversion] disorders                                                           |
|                                                                    | F45         | Somatoform disorders                                                                          |
|                                                                    | F48         | Other neurotic disorders                                                                      |
| Low intelligence                                                   | F70–79      | Mental retardation                                                                            |
| Hyperkinetic problems                                              | F90         | Hyperkinetic disorders                                                                        |
| Disruptive behaviors                                               | F91         | Conduct disorders                                                                             |
|                                                                    | F92         | Mixed disorders of conduct and emotions                                                       |
|                                                                    | F93         | Emotional disorders with onset specific to childhood                                          |
|                                                                    | F94         | Disorders of social functioning with onset specific to childhood and adolescence              |
| Tic symptoms                                                       | F95         | Tic disorders                                                                                 |
| Psychotic symptoms                                                 | F20–29      | Schizophrenia, schizotypal and delusional disorders                                           |
| Mood-bipolarity                                                    | F30         | Manic episode                                                                                 |
|                                                                    | F31         | Bipolar affective disorder                                                                    |
| Others                                                             | F50         | Eating disorders                                                                              |
|                                                                    | F51         | Nonorganic sleep disorders                                                                    |
| Personality problem                                                | F60–69      | Personality disorders                                                                         |
| Learning and developmental problems                                | F80         | Specific developmental disorders of speech and language                                       |
|                                                                    | F81         | Specific developmental disorders of scholastic skills                                         |
|                                                                    | F84         | Pervasive developmental disorders                                                             |
| Unspecified mental disorder                                        | F99         |                                                                                               |
| Symptoms, signs and abnormal clinical and laboratory findings, NEC | R40–R46     | Symptoms and signs involving cognition, perception, emotional state and behaviour             |
|                                                                    | R47–R49     | Symptoms and signs involving speech and voice                                                 |
|                                                                    | R50–R69     | General symptoms and signs                                                                    |
|                                                                    | R90–R94     | Abnormal findings on diagnostic imaging and in function studies, without diagnosis            |
| Factors influencing health status and contact with health services | Z30–Z39     | Persons encountering health services in circumstances related to reproduction                 |
|                                                                    | Z40–Z54     | Persons encountering health services for specific procedures and health care                  |
|                                                                    | Z55–Z65     | Persons with potential health hazards related to socioeconomic and psychosocial circumstances |
|                                                                    | Z70–Z76     | Persons encountering health services in other circumstances                                   |

KCD-7: Korean Standard Classification of Diseases-7.

**Table S2.** Number of first-time patients with clinical diagnosis by year.

| Diagnosis | 2009 | 2010 | 2011 | 2012 | 2013 | 2014 | 2015 | 2016 | Estimate | CI            | <i>p</i> -Value |
|-----------|------|------|------|------|------|------|------|------|----------|---------------|-----------------|
| F32–33    | 15   | 24   | 14   | 23   | 15   | 18   | 11   | 28   | 0.014    | −0.020 0.047  | 0.3655          |
| F40–48    | 31   | 45   | 37   | 65   | 22   | 28   | 37   | 28   | −0.007   | −0.077 0.063  | 0.8214          |
| F70–79    | 23   | 21   | 19   | 11   | 10   | 3    | 7    | 10   | −0.028   | −0.048 −0.007 | 0.0155          |
| F90       | 74   | 72   | 96   | 101  | 58   | 53   | 42   | 44   | −0.061   | −0.147 0.025  | 0.1355          |
| F91–94    | 11   | 19   | 16   | 8    | 7    | 5    | 4    | 4    | −0.022   | −0.039 −0.005 | 0.0187          |
| F95       | 31   | 24   | 27   | 27   | 16   | 13   | 11   | 20   | −0.022   | −0.048 0.004  | 0.0805          |
| Other     | 25   | 25   | 17   | 18   | 13   | 10   | 15   | 12   | −0.019   | −0.035 −0.004 | 0.0220          |

F32, 33: Depressive disorder; F40–48: Neurotic disorder; F70–79: Mental retardation; F90: Hyperkinetic disorders; F91–94: Disruptive behaviour disorder; F95: Tic disorders; Other; F20–29, F30, F31, F50, F51, F60–69, F80, F81, F84, F99, F20–29: Psychotic disorder; F30, 31: Bipolar disorder; F50, F51: Eating and Sleep disorder; F60–69: Personality disorder; F80–84: Learning and developmental disorder; F99: Unspecified mental disorder.

**Table S3.** Clinical characteristics of early dropout group and treatment continuity group by gender and grade (%).

|                            |       | Total ( <i>n</i> = 1432) |        | Male ( <i>n</i> = 911) |        | Female ( <i>n</i> = 521) |        | <i>p</i> -Value * | <i>p</i> -Value * |
|----------------------------|-------|--------------------------|--------|------------------------|--------|--------------------------|--------|-------------------|-------------------|
| Early dropout group        |       | 645                      | (45.0) | 423                    | (46.4) | 222                      | (42.6) | <0.0017           |                   |
| Grade                      | 1–3   | 191                      | (29.6) | 143                    | (33.8) | 48                       | (21.6) | <0.0001           |                   |
|                            | 4–6   | 136                      | (21.1) | 94                     | (22.2) | 42                       | (18.9) |                   |                   |
|                            | 7–9   | 167                      | (25.9) | 98                     | (23.2) | 69                       | (31.1) |                   |                   |
|                            | 10–12 | 151                      | (23.4) | 88                     | (20.8) | 63                       | (28.4) |                   |                   |
| Treatment continuity group |       | 787                      | (55.0) | 488                    | (53.6) | 299                      | (57.4) | <.0001            |                   |
| Grade                      | 1–3   | 214                      | (27.2) | 156                    | (32.0) | 58                       | (19.4) | <.0001            |                   |
|                            | 4–6   | 142                      | (18.0) | 98                     | (20.1) | 44                       | (14.7) |                   |                   |
|                            | 7–9   | 202                      | (25.7) | 118                    | (24.2) | 84                       | (28.1) |                   |                   |
|                            | 10–12 | 229                      | (29.1) | 116                    | (23.8) | 113                      | (37.8) |                   |                   |

\* chi-square test, \*\* CochranMantel-Haenszel test.
